# Supplementary material for: Submacular Parasite Masquerading as Posterior Pole Granuloma
Source: Hindawi journal article supplement (doi:10.1155/2015/910383), 2015-01-01
Supplement: f1 [file 910383.f1.pdf]

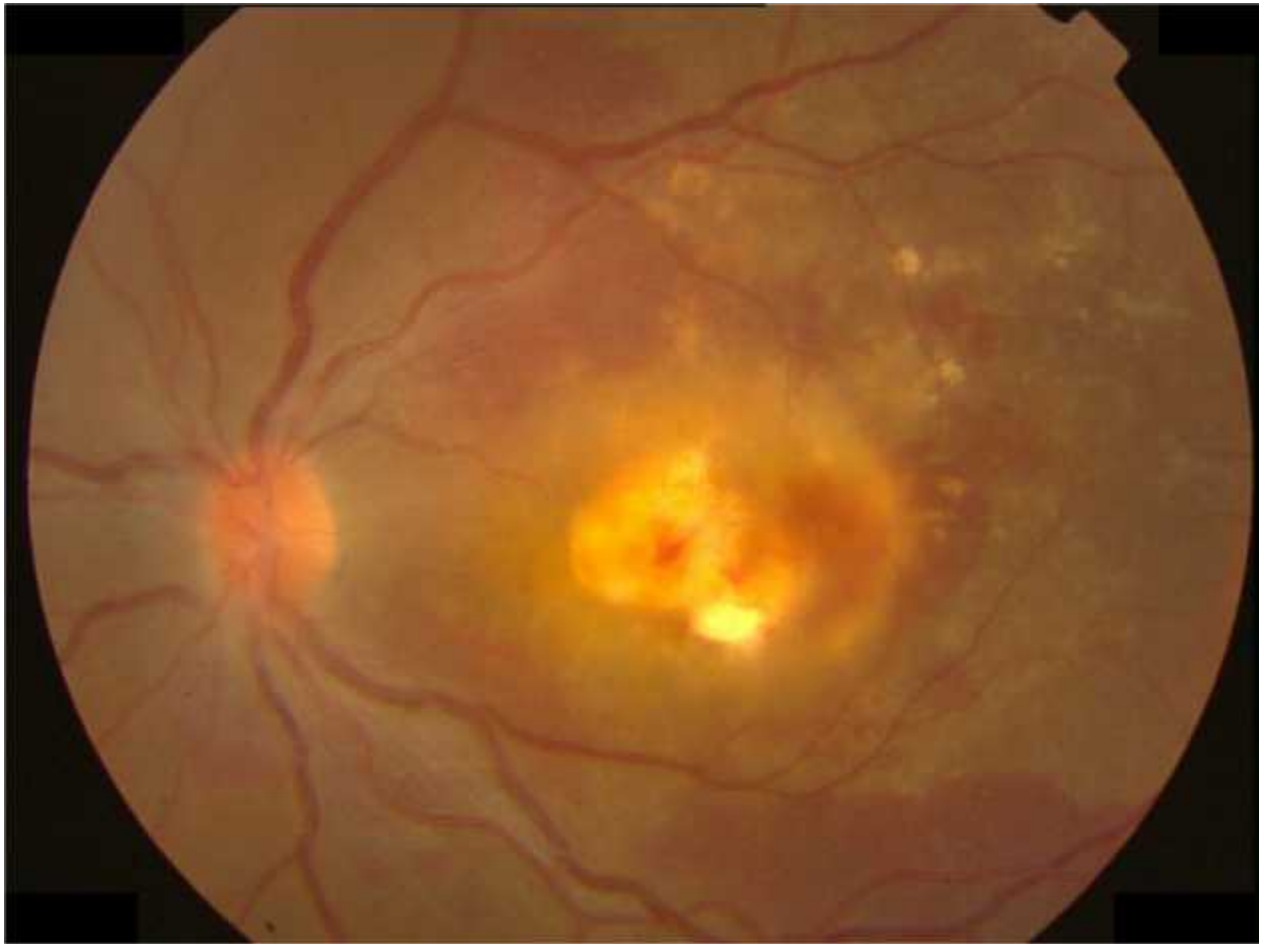

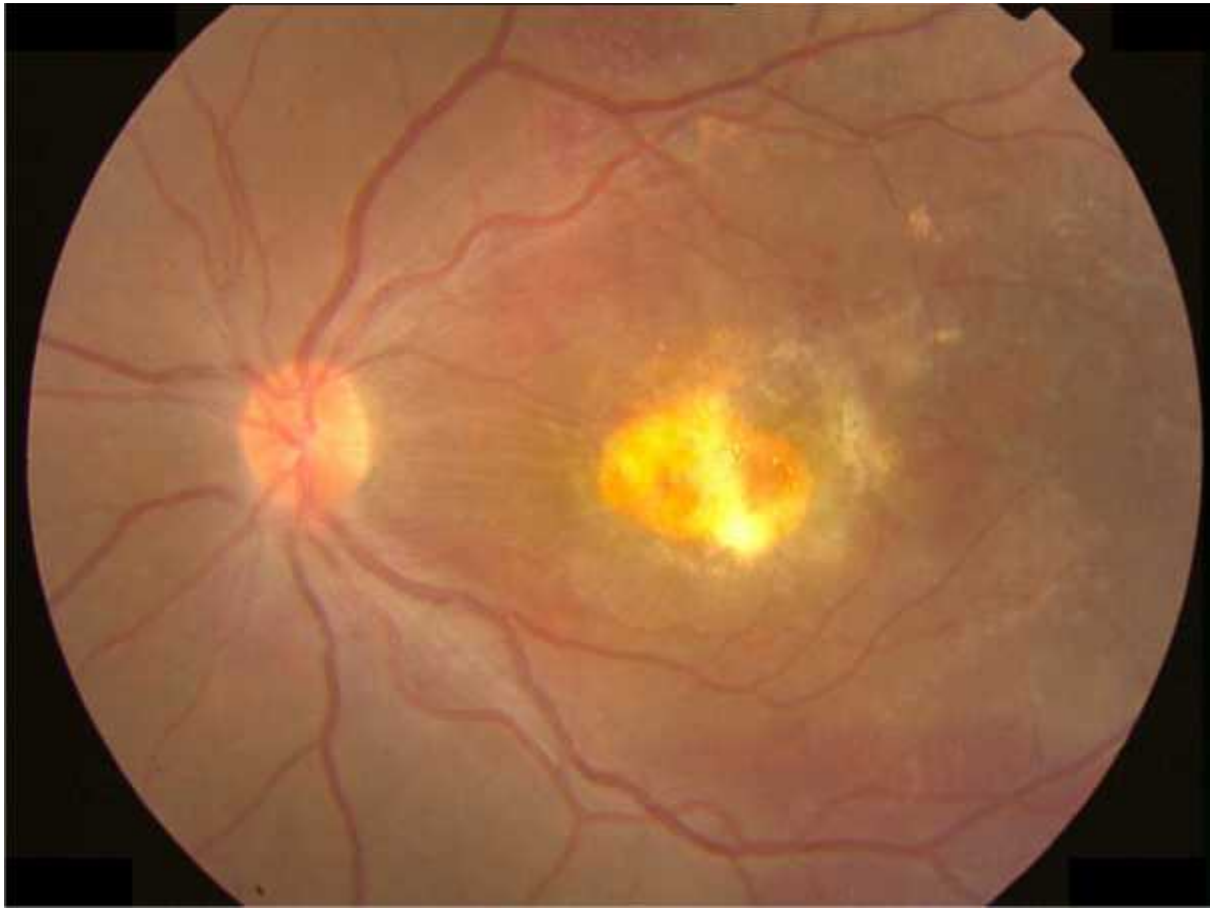

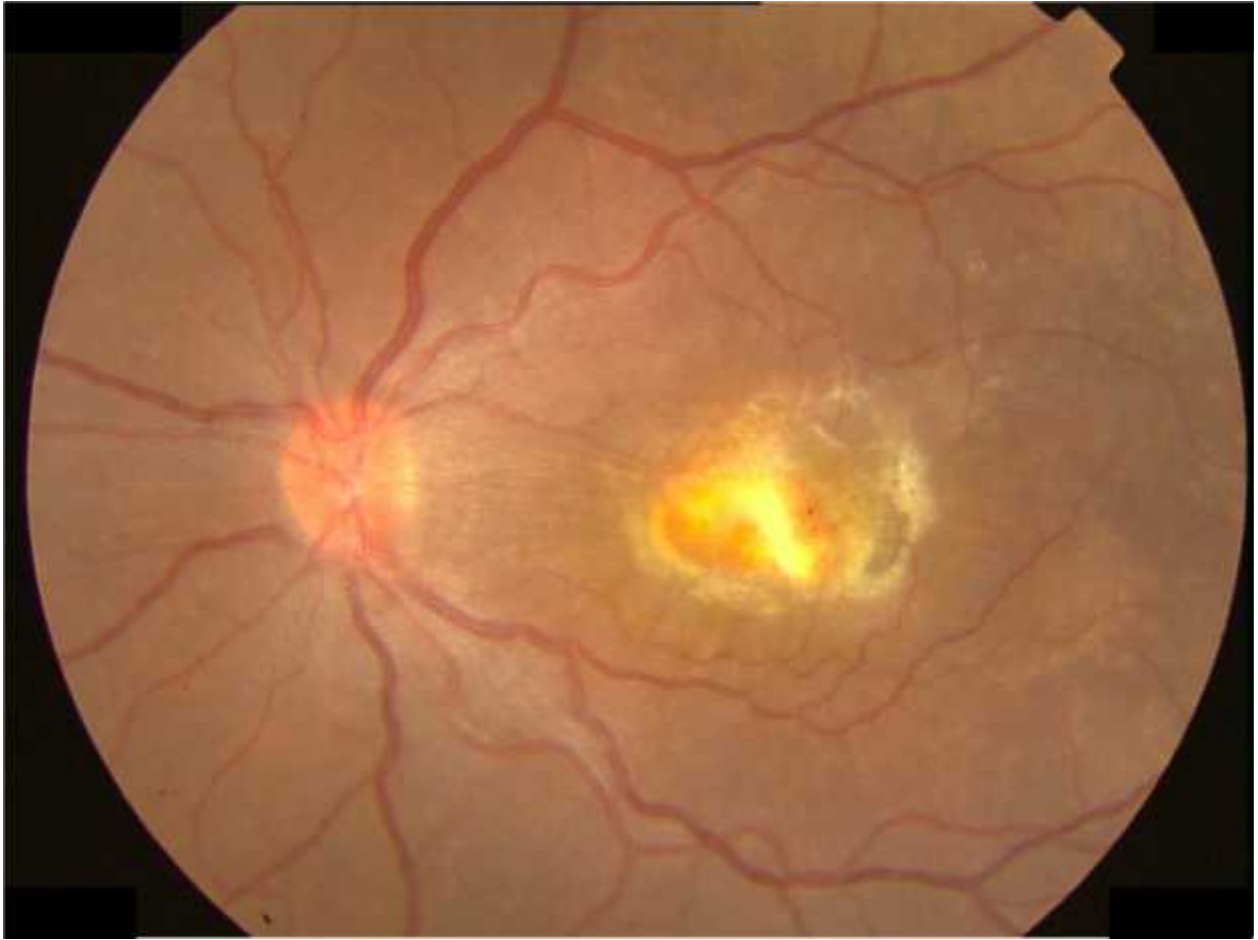

Color fundus picture of posterior pole (Left eye) at 10 days (A), 4 weeks (B) and 8weeks (C) follow-up after initiation of medical therapy. Note the regression of the subretinal haemorrhage, perivascular sheathing, disc edema and consolidation of the posterior pole granuloma. Bright yellow-white center of the granuloma appeared calcified, the same was demonstrated on B-scan ultrasonography.
